# Supplementary material
Source: publisher site journal article supplement (https://www.e-cmh.org/upload/media/cmh-2023-0449-Supplementary-Table-2.pdf)
Supplement: Supplementary file 1 [file cmh-2023-0449-Supplementary-Table-2.pdf]

**Supplementary Table 2.** Number of samples for NGS sequencing

| Sequencing type | Disease stage | Steatosis | MASH | Total samples |
|-----------------|---------------|-----------|------|---------------|
| WGS             |               | 56        | 64   | 120           |
| WES             |               | 42        | 57   | 99            |
| WGBS            |               | 44        | 60   | 104           |
| totRNAseq       |               | 60        | 73   | 133           |
| WGS from Blood  |               | 35        | 48   | 83            |
| Total Samples   |               | 60        | 74   | 134           |
